# Supplementary material for: Application of High-Performance Liquid Chromatography Coupled with Linear Ion Trap Quadrupole Orbitrap Mass Spectrometry for Qualitative and Quantitative Assessment of Shejin-Liyan Granule Supplements
Source: MDPI journal article supplement (doi:10.3390/molecules23040884), 2018-04-11
Supplement: s1 [file s1]

## Supplementary Materials:

The chemical structures of the 54 compounds were characterized as follow:

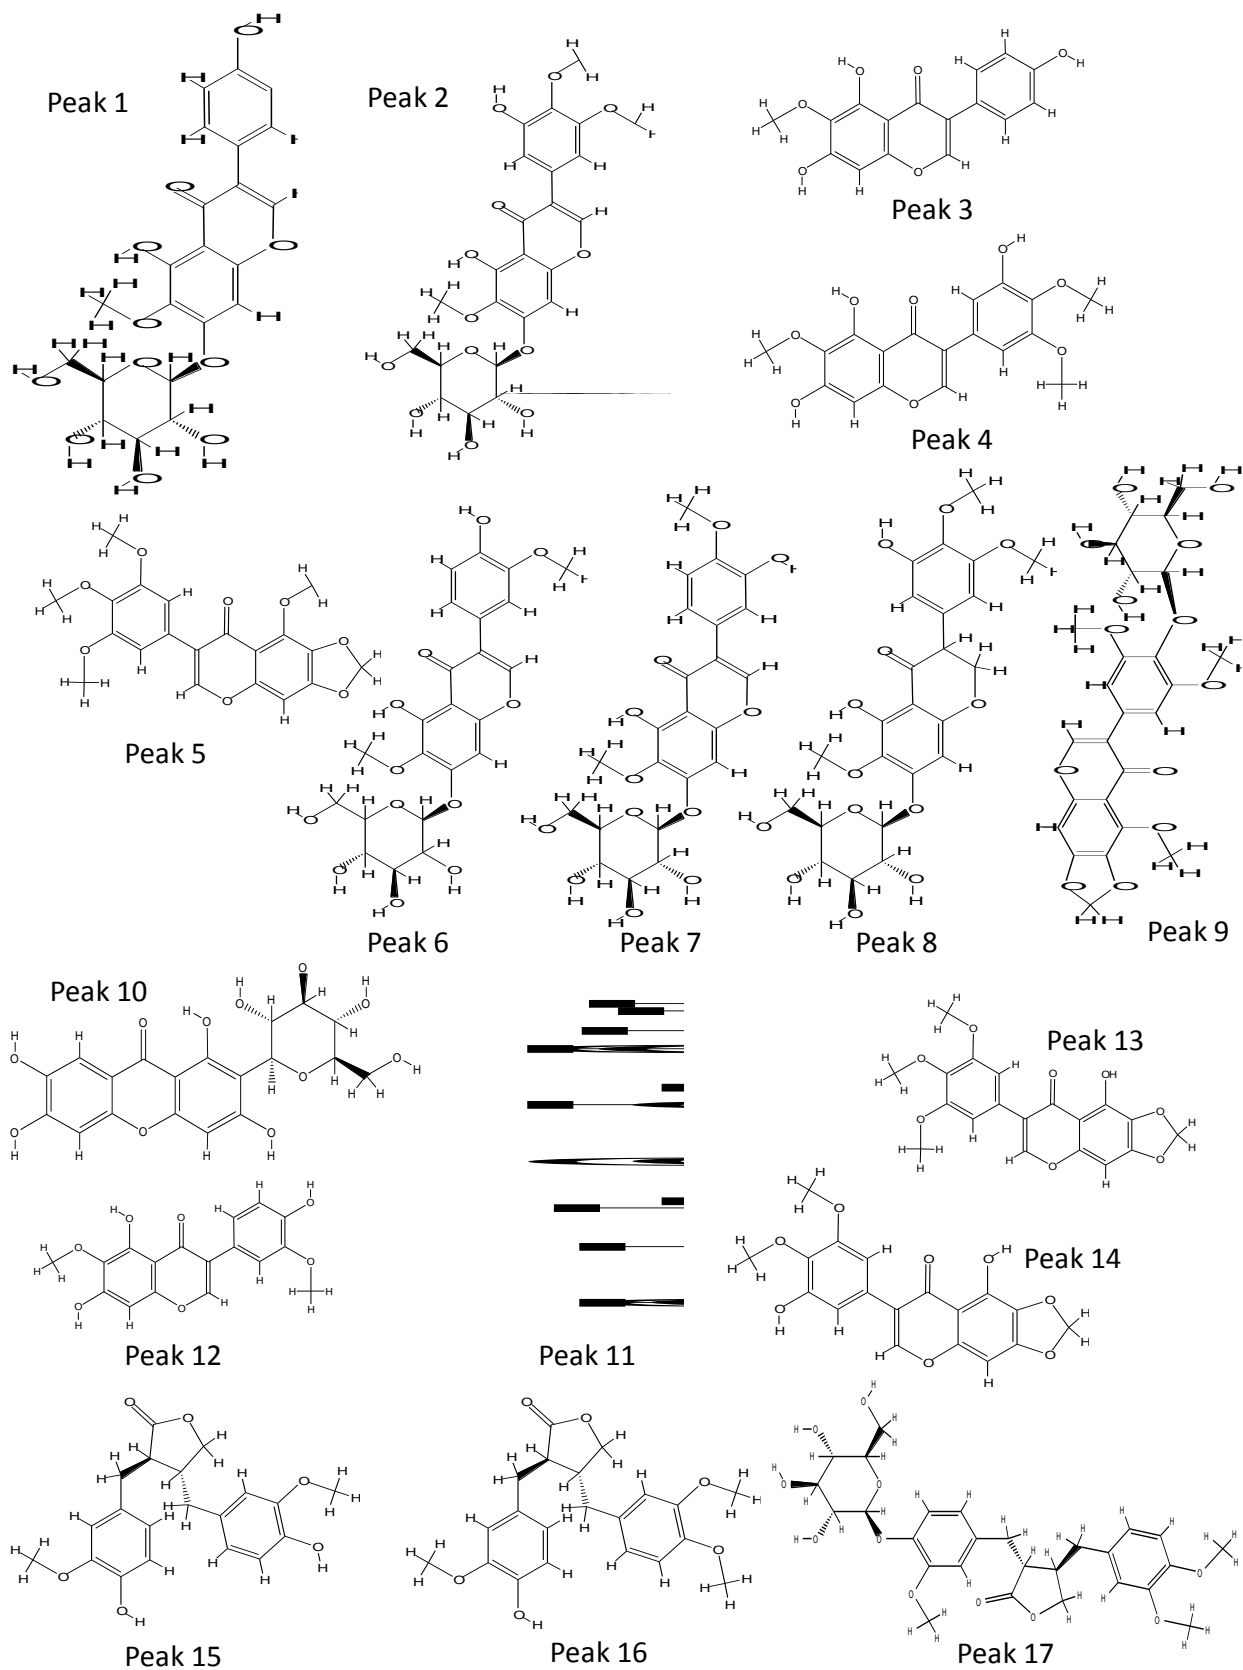

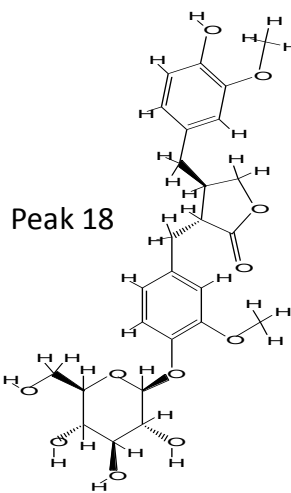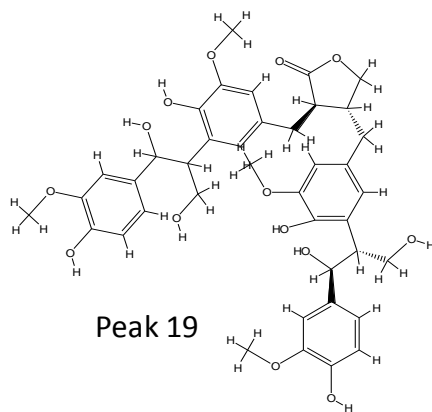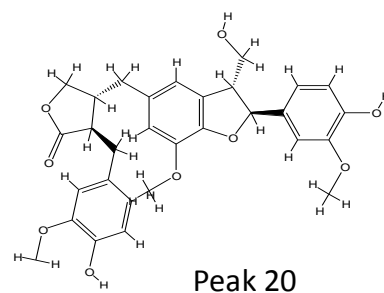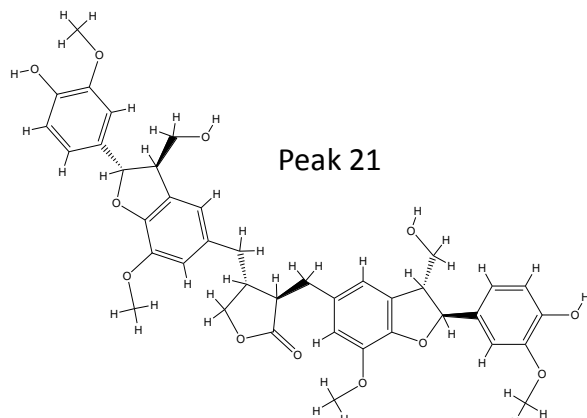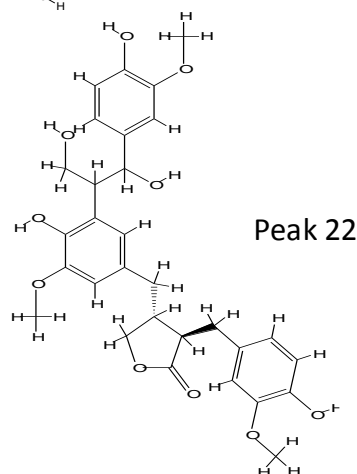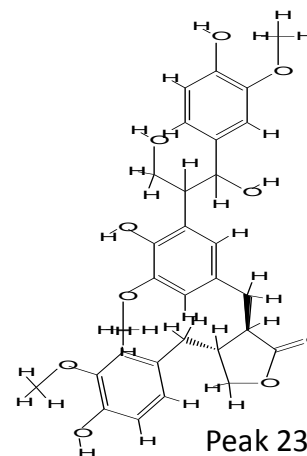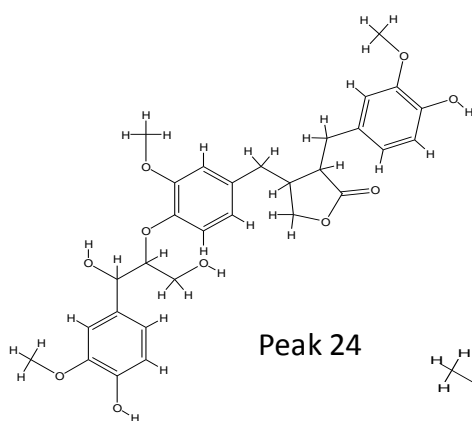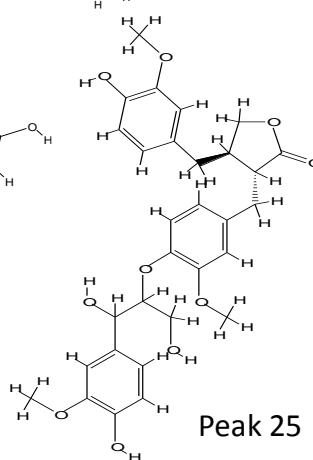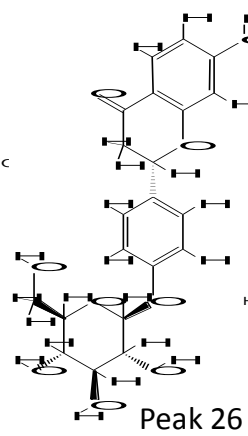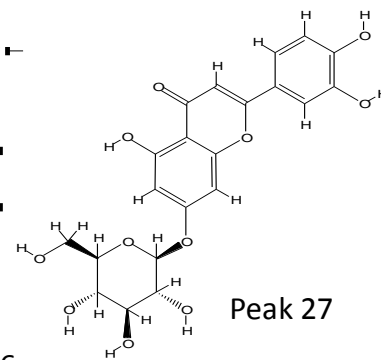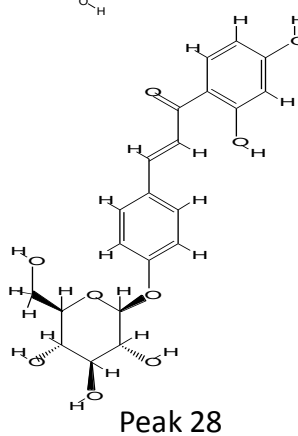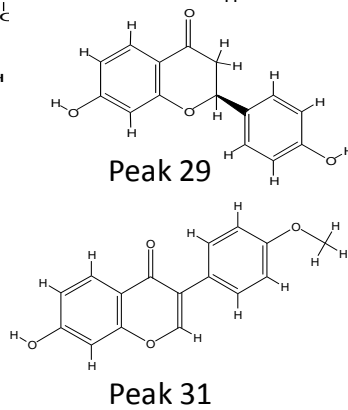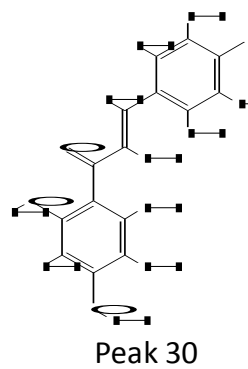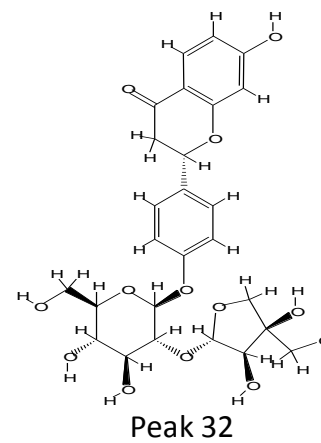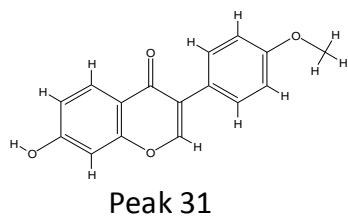

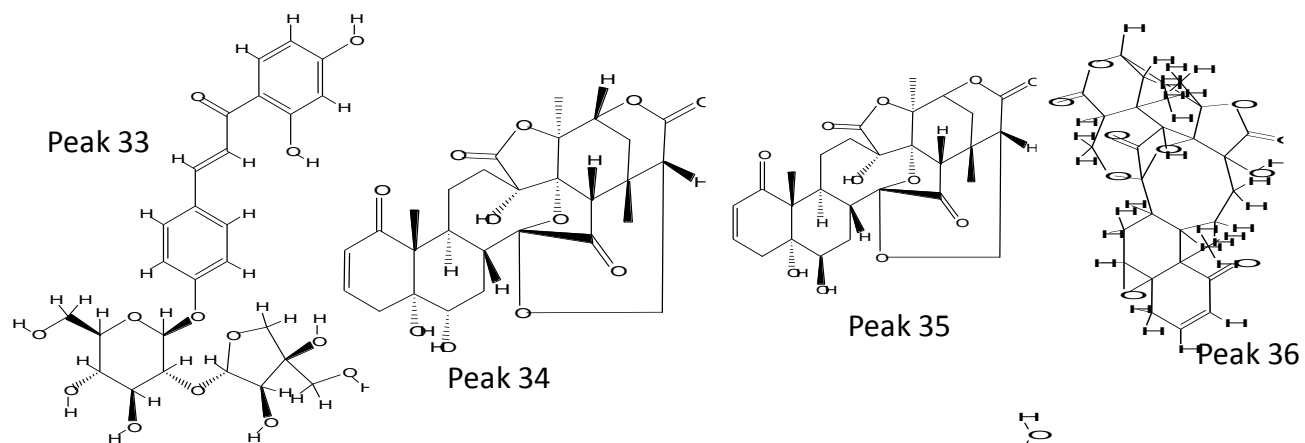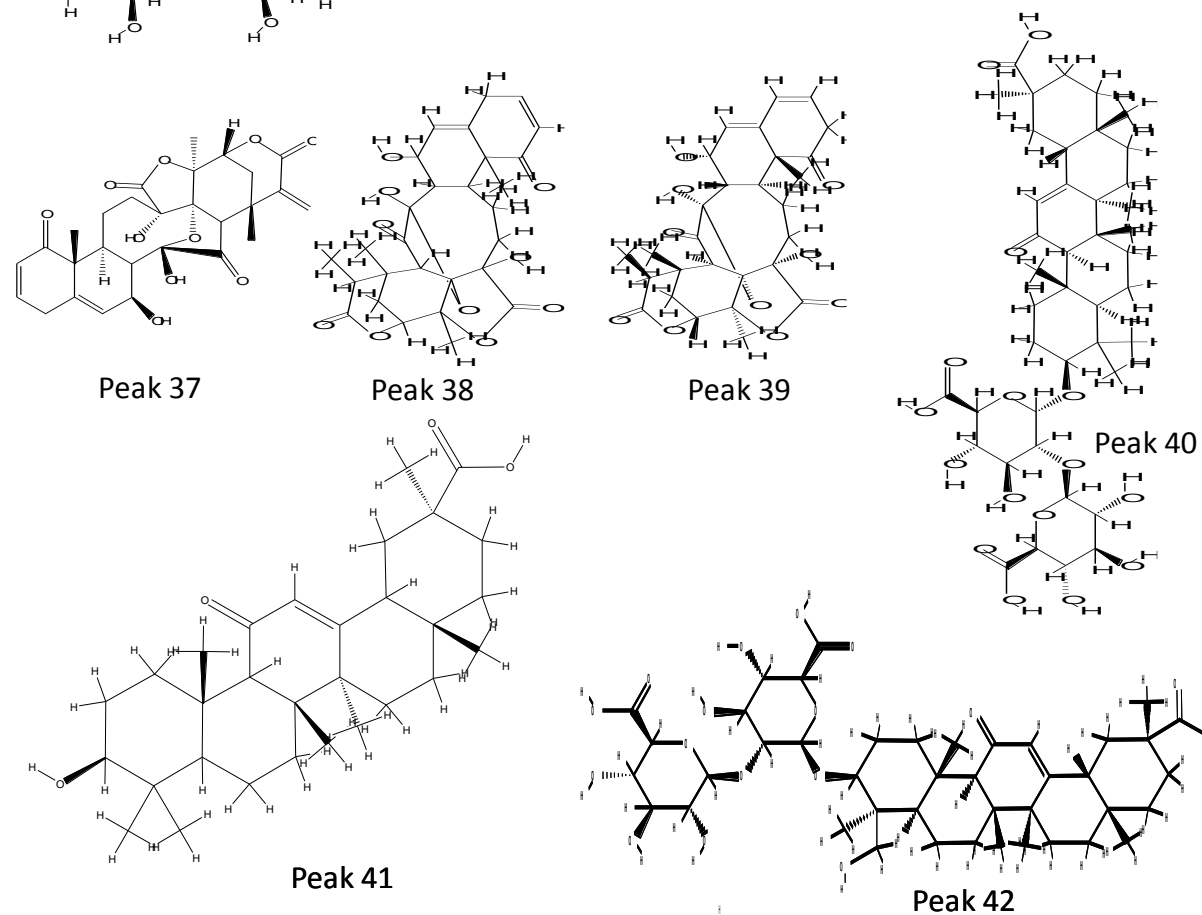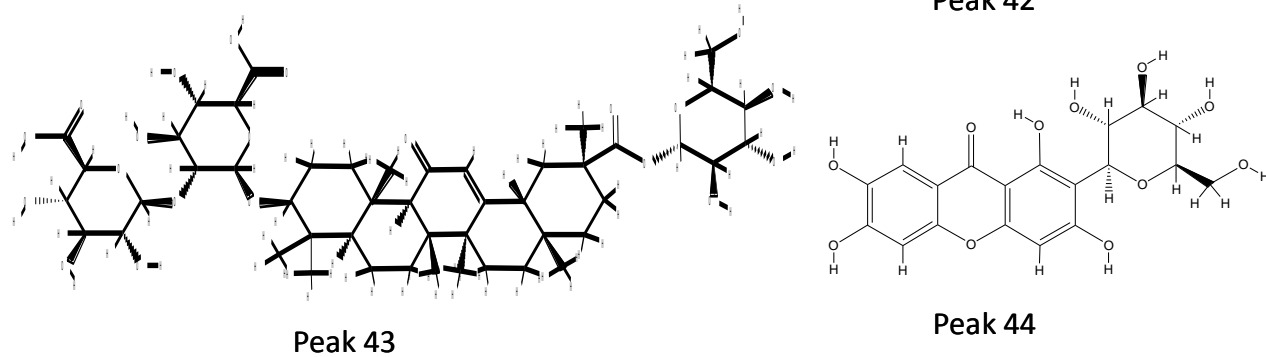

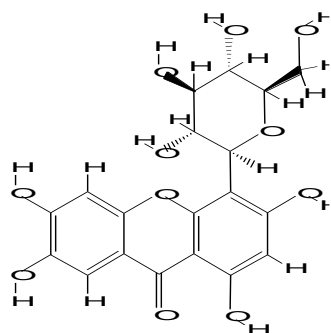

Peak 45

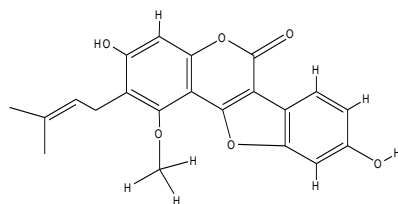

Peak 46

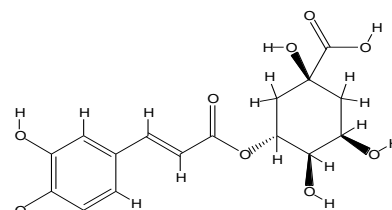

Peak 47

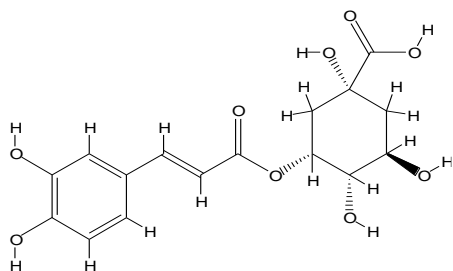

Peak 48

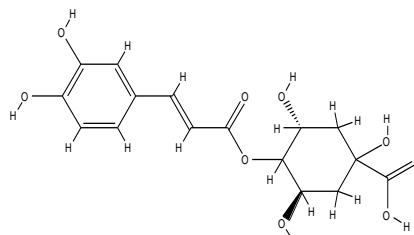

Peak 49

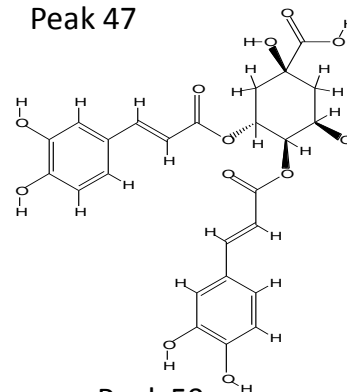

Peak 50

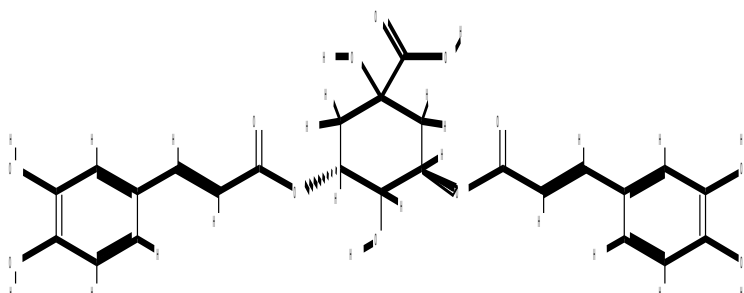

Peak 51

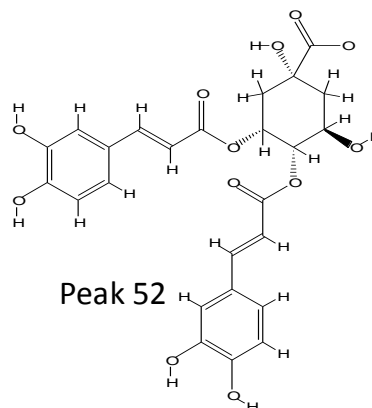

Peak 52

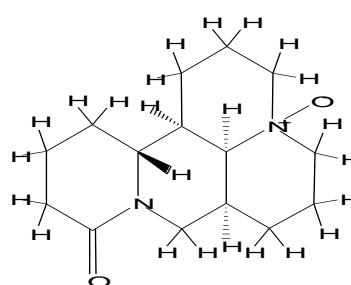

Peak 53

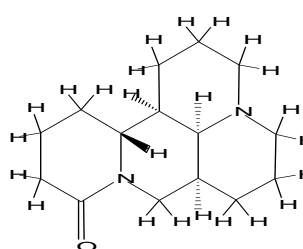

Peak 54
